# Supplementary material for: A reverse genetic approach identifies an ancestral frameshift mutation in RP1 causing recessive progressive retinal degeneration in European cattle breeds
Source: Genet Sel Evol. 2016 Aug 10;48:56. doi: 10.1186/s12711-016-0232-y (PMC4980790; doi:10.1186/s12711-016-0232-y)
Supplement: Supplementary file 3 — 10.1186/s12711-016-0232-y Additional information on the results of the gene enrichment analysis performed with Ingenuity Pathway Analysis. This file contains five tables providing additional details on the results of the gene enrichment analysis: a summary of the significant diseases and disorders annotations (Table S3), a summary of significant physiological system development and function annotations (Table S4), a summary of significant molecular and cellular functions annotations (Table S5), the key-word attribution to each significant functional annotation conserved for the analysis (Table S6) and the significant canonical pathways (Table S7). [file 12711_2016_232_MOESM3_ESM.xlsx]

## Sheet: Table S3
Table S2. Summary of significant diseases and disorders annotations
Annotation category	Number of functional annotations	Minimal number of genes	Maximal number of genes	Minimal p-Value	Maximal p-Value
Organismal Injury and Abnormalities	72	2	211	4.45e-10	0.0185
Hereditary Disorder	38	2	177	4.45e-10	0.0185
Neurological Disease	26	2	117	2.85e-05	0.0185
Developmental Disorder	21	2	47	2.78e-05	0.0178
Cardiovascular Disease	13	2	61	3.7e-05	0.0178
Dermatological Diseases and Conditions	12	2	10	2.78e-05	0.0192
Ophthalmic Disease	11	3	44	6.64e-05	0.0178
Skeletal and Muscular Disorders	11	2	24	0.00128	0.0178
Hematological Disease	9	2	128	0.000598	0.0149
Renal and Urological Disease	8	2	203	3.56e-06	0.0155
Auditory Disease	6	3	24	0.000203	0.0178
Metabolic Disease	5	2	13	0.00269	0.0155
Connective Tissue Disorders	5	2	8	2.78e-05	0.00807
Immunological Disease	5	2	128	0.0063	0.0149
Gastrointestinal Disease	4	2	5	0.000538	0.00807
Reproductive System Disease	3	6	211	1.84e-07	0.0129
Inflammatory Disease	3	4	11	0.0023	0.0149
Behavior	2	2	18	0.00161	0.00807
Hepatic System Disease	2	2	2	0.00807	0.00807
Endocrine System Disorders	2	4	6	0.00083	0.0128
Infectious Diseases	2	3	4	0.0063	0.0128
Respiratory Disease	1	11	11	0.0149	0.0149

## Sheet: Table  S4
Table S3. Summary of significant physiological system development and function annotations
Annotation category	Number of functional annotations	Minimal number of genes	Maximal number of genes	Minimal p-Value	Maximal p-Value
Tissue Development	34	2	90	5.85e-05	0.0192
Organismal Development	30	2	152	0.000105	0.0192
Nervous System Development and Function	27	2	97	0.000105	0.0155
Organ Morphology	24	2	44	0.000105	0.0192
Embryonic Development	24	2	152	0.000105	0.0192
Organ Development	20	4	79	5.85e-05	0.0191
Tissue Morphology	16	2	36	0.000105	0.0192
Visual System Development and Function	14	3	44	5.85e-05	0.0191
Cardiovascular System Development and Function	12	2	11	0.00141	0.0185
Skeletal and Muscular System Development and Function	10	2	22	0.000178	0.0192
Hematological System Development and Function	6	2	36	0.00807	0.0178
Hair and Skin Development and Function	3	3	4	0.0063	0.0178
Auditory and Vestibular System Development and Function	3	2	7	0.000892	0.00807
Reproductive System Development and Function	1	4	4	0.00182	0.00182
Respiratory System Development and Function	1	2	2	0.00807	0.00807
Digestive System Development and Function	1	4	4	0.00182	0.00182
Connective Tissue Development and Function	1	6	6	0.011	0.011
Inflammatory Response	1	36	36	0.0114	0.0114
Hematopoiesis	1	3	3	0.0118	0.0118
Renal and Urological System Development and Function	1	3	3	0.0027	0.0027

## Sheet: Table S5
Table S4. Summary of significant molecular and cellular functions annotations
Annotation category	Number of functional annotations	Minimal number of genes	Maximal number of genes	Minimal p-Value	Maximal p-Value
Cellular Assembly and Organization	46	2	257	1.25e-07	0.0192
Cellular Function and Maintenance	40	2	257	1.25e-07	0.0192
Cell Morphology	38	2	285	1.46e-05	0.0192
Cell-To-Cell Signaling and Interaction	24	2	21	0.000118	0.0178
Small Molecule Biochemistry	18	2	13	0.000724	0.0185
Molecular Transport	14	2	13	0.000724	0.0185
Lipid Metabolism	10	2	13	0.000724	0.0125
Carbohydrate Metabolism	7	2	11	0.000724	0.0189
Cell Cycle	16	2	28	0.000747	0.0178
Cellular Compromise	8	3	7	0.00128	0.0178
Cell Death and Survival	14	3	10	0.00128	0.0192
DNA Replication	9	2	28	0.00247	0.0178
Cellular Development	8	2	92	0.00338	0.0192
Cellular Growth and Proliferation	8	2	92	0.00338	0.0192
Drug Metabolism	2	3	4	0.0063	0.00876
Cellular Movement	8	2	25	0.0063	0.0171
Immune Cell Trafficking	2	2	6	0.00807	0.0171
Cell-mediated Immune Response	2	2	6	0.00807	0.0171
Cell Signaling	2	2	3	0.00807	0.0118
Energy Production	2	2	2	0.00807	0.00807
Amino Acid Metabolism	2	2	4	0.00807	0.00876
Vitamin and Mineral Metabolism	1	2	2	0.00807	0.00807

## Sheet: Table S6
Table S5. Key-word attribution to functional annotations conserved from the enrichment analysis results
Annotation Category	Diseases or functionnal annotations	Associated Key-word	p-Value	Genes	Number of genes
Hereditary Disorder, Organismal Injury and Abnormalities	autosomal recessive disease	hereditary~disorder	4.45e-10	AARS,AASS,ABCA12,ABCA4,ABCC6,ACAN,ADAMTS17,ADAMTS4,ADCK3,ADGRV1,AGK,AGT,ALMS1,ALS2,ANK3,AP4B1,AP4E1,AP4M1,APOB,ASPM,ATP6V0A4,ATP8A2,BBS7,BCL2L1,BLNK,BRCA2,C2CD3,C5orf42,CAPN3,CC2D2A,CCDC88C,CERKL,CHMP1A,CHRNG,CLEC7A,CNGA1,CNGB1,COL6A3,COL7A1,CP,CRB1,CSF3R,CYP24A1,CYP7B1,DARS,DCDC2,DCHS1,DCLRE1C,DFNB59,DLL3,DMP1,DOCK8,DPYD,DRC1,DSE,DSG1,DYSF,ECHS1,EFEMP2,ENPP1,EPM2A,ERCC6,EXPH5,FAM161A,FAT4,FBLN5,…	177
Organismal Injury and Abnormalities, Reproductive System Disease	prostatic disease	reproductive~system	1.84e-07	ABCA12,ABCC5,ACAN,ACO1,ACPP,ACSL3,ADAM15,ADAMTS7,ADAMTSL3,AGER,AGT,ALOX15B,AMICA1,ANKRD17,ANO6,ANXA11,ANXA3,AP4B1,APC,AQP8,ASH1L,BCL2L1,BDP1,BRCA2,BTRC,C16orf62,C5orf42,CAPN8,CAPZA3,CCL25,CD44,CDC7,CENPE,CENPF,CHD2,CHEK2,CHIA,CNDP2,COL6A3,COL7A1,CPNE8,CRB1,CRTAC1,CSN3,CYP24A1,DCHS2,DENND4B,DHX34,DMXL2,DNAH11,DNAH5,DNAH7,DPY19L2,DUSP27,DYNC1I1,E2F7,EFCAB6,EHMT1,EIF2AK1,EIF2S2,EIF4B,ELP2,ENO2,EXPH5…	211
Organismal Injury and Abnormalities, Renal and Urological Disease	renal lesion	kidney	3.56e-06	ABCA6,ABCA7,ACAN,ACSL3,ADAM28,ADAMTS7,AGER,AGT,AGXT2,AJUBA,AKAP9,ALAS1,ALPK2,ANK2,ANKRD31,AP5M1,APC,ARAP2,ARHGEF5,ARID5B,ASAP3,ASPM,ASXL1,ASXL2,ATAD5,BCL2L1,BDP1,BRCA2,BTRC,C1S,CCDC136,CCDC186,CCT3,CD44,CDCP2,CDK12,CEBPZ,CENPE,CENPF,CHEK2,CMYA5,CRNN,CSMD2,CSMD3,CUBN,DCLRE1A,DDX58,DHX35,DIEXF,DLGAP5,DMXL1,DNAH17,DNAH7,DNAH8,DNHD1,DNMBP,DOCK8,DOPEY2,EBPL,ERBB4,FAM208B,FAP,FAT3,FBXW7,FCAMR,FCRLA,FGF…	203
Connective Tissue Disorders, Dermatological Diseases and Conditions, Developmental Disorder, Hereditary Disorder, Organismal Injury and Abnormalities	inherited epidermolysis bullosa	skin	2.78e-05	COL17A1,COL7A1,DSP,EXPH5,ITGA3,ITGA6,LAMA3,LAMB3	8
Neurological Disease	brain lesion	brain	2.85e-05	ABCA7,ABCC3,ADAM12,ADAMTS4,ADAMTS7,ALPK2,ANK2,ANO2,APC,ASPM,ASXL1,ASXL3,BRCA2,BUD31,C6,CACNA1C,CD44,CDC42BPA,CDH18,CDH8,CENPF,CHEK2,CLIP1,COCH,CSF3R,CSMD3,DBT,DCHS2,DENND4B,DHTKD1,DIAPH3,DMBT1,DNAH17,DNAH8,EFCAB6,EPHA5,ERBB4,GLTSCR2,HCN1,HDAC2,HERC1,HMCN1,HMGB3,ICE1,IL16,ITSN1,KDM5A,KEL,KRIT1,KRT2,LCP1,LDLR,LIG4,LMOD3,LRIG2,LURAP1L,LYST,MAP3K1,MAP4,MCCC2,MCOLN3,MKI67,MSH2,MSH6,MUC16,MYO15A,NF1,NO…	117
Cardiovascular Disease	microangiopathy	cardiovascular~system	3.7e-05	ABCC2,ADAMTSL3,ADH7,APC,ASXL1,BCL2L1,BCL6,BRCA2,BRIP1,C5,CUBN,DIS3,DPYD,EPHA5,EPHA7,ERC1,ERCC6,FANCA,FANCE,FHIT,IGF2R,IL17F,IPP,KIAA1549,KMT2A,KRIT1,LAMA1,LAMA5,LRP6,MAP3K1,MDM4,MSH2,MSH6,MTUS2,MYH9,NF1,NOS1,NOS2,NSD1,PALB2,PARK2,PKHD1,PLCE1,PRAME,PREX2,RANBP2,RB1,RET,RNF43,ROS1,RUNX1T1,SETBP1,SETD2,SLC22A2,SMARCA4,STAMBP,TET1,TET3,TRIM33,XPC,ZNF217	61
Cellular Function and Maintenance, Organ Development, Tissue Development, Visual System Development and Function	maintenance of photoreceptors	retina	5.85e-05	ABCA4,ADGRV1,CDHR1,ERCC6,MAK,PCDH15,PDE6A,RP1,RP1L1,TUB,USH1C,USH2A	12
Hereditary Disorder, Ophthalmic Disease, Organismal Injury and Abnormalities	autosomal recessive retinal degeneration	retina	6.64e-05	ABCA4,CERKL,CNGA1,CNGB1,CRB1,FAM161A,IMPG2,MAK,PCYT1A,PDE6A,RP1,TTC8,USH2A	13
Cell Morphology, Embryonic Development, Nervous System Development and Function, Organ Development, Organ Morphology, Organismal Development, Tissue Development, Tissue Morphology, Visual System Development and Function	abnormal morphology of amacrine cells	retina	0.000105	FAT3,LAMB2,PLXNA2,PLXNA4,SEMA5A	5
Connective Tissue Disorders, Dermatological Diseases and Conditions, Developmental Disorder, Hereditary Disorder, Organismal Injury and Abnormalities	epidermolysis bullosa junctional	skin	0.000105	COL17A1,EXPH5,ITGA6,LAMA3,LAMB3	5
Cell Morphology, Organ Development, Organ Morphology, Skeletal and Muscular System Development and Function, Tissue Morphology	size of skeletal muscle cells	muscles	0.000178	CHRNG,DYSF,ITGA7,KEL,LAMA2,MSTN,MYH4,POMGNT1,PRKAB2,RYR1,SCYL1,SGCG	12
Auditory Disease, Hereditary Disorder, Neurological Disease, Organismal Injury and Abnormalities	autosomal recessive deafness	ears	0.000203	ADGRV1,DCDC2,DFNB59,HSD17B4,LARS2,LOXHD1,MARVELD2,MYO15A,OTOG,OTOGL,PCDH15,PTPRQ,SLC26A4,STRC,TMPRSS3,USH1C,USH2A	17
Hereditary Disorder, Ophthalmic Disease, Organismal Injury and Abnormalities	autosomal recessive retinitis pigmentosa	retina	0.000216	CERKL,CNGA1,CNGB1,CRB1,FAM161A,IMPG2,MAK,PDE6A,RP1,TTC8,USH2A	11
Cell Morphology, Embryonic Development, Organ Development, Organ Morphology, Organismal Development, Tissue Development, Visual System Development and Function	morphology of eye cells	eyes	0.000221	ABCA4,ABI2,ATF4,ATP8A2,BCAR3,CPLX3,CRB1,EGFLAM,FAT3,LAMB2,MITF,NEUROD4,PLXNA2,PLXNA4,RARB,RB1,RDH13,RP1,RP1L1,RPGRIP1,SEMA4A,SEMA5A,TP53BP2,USH2A	24
Hereditary Disorder, Ophthalmic Disease, Organismal Injury and Abnormalities	retinitis pigmentosa	retina	0.000253	ABCA4,ADGRV1,CDHR1,CERKL,CNGA1,CNGB1,CRB1,FAM161A,IFT140,IMPG2,MAK,PCDH15,PDE6A,RP1,RP1L1,SEMA4A,TTC8,USH1C,USH2A	19
Embryonic Development, Nervous System Development and Function, Organ Development, Organ Morphology, Organismal Development, Tissue Development, Visual System Development and Function	morphology of neural retina	retina	0.000258	FAT3,ITGA3,ITGA6,LAMB2,PLXNA2,PLXNA4,SEMA5A	7
Antimicrobial Response	aggregation of virus	immune~system	0.000301	DMBT1,LDLR,SFTPA1,SFTPD	4
Cell-To-Cell Signaling and Interaction, Nervous System Development and Function	binding of Schwann cells	nervous~system	0.000301	CD44,ITGA6,ITGA7,LAMA2	4
Hereditary Disorder, Neurological Disease, Organismal Injury and Abnormalities	hereditary neuropathy	Neurological~Disease	0.000387	AARS,ALS2,AP4B1,AP4E1,AP4M1,ARHGEF10,BCL2L1,CYP7B1,DFNB59,DHTKD1,DIAPH3,DYNC1H1,ERBB4,GDAP1,GIGYF2,IKBKAP,KIF1C,MAPT,NOS1,OPA1,PARK2,PLEKHG5,PNPLA6,SCN10A,SCN11A,SETX,SLC12A6,SLC1A2,SPTLC1,SQSTM1,WNK1,ZFYVE26	32
Cardiovascular Disease, Developmental Disorder, Hematological Disease, Hereditary Disorder, Organismal Injury and Abnormalities	Fanconi's anemia	hematologic~system	0.000598	BRCA2,BRIP1,FANCA,FANCC,FANCE,PALB2,RAD51C,SLX4	8
Developmental Disorder, Hereditary Disorder, Ophthalmic Disease, Organismal Injury and Abnormalities	cryptophthalmos	eyes	0.000724	FREM1,GRIP1,GRIP2	3
Cell Morphology, Cellular Assembly and Organization	elongation of plasma membrane projections	blood	0.000735	AATK,AGER,AGT,ALCAM,ARHGAP32,DIAPH1,ITGA7,MAP1B,MAP2,MAPT,MYOC,OMG,PHACTR3,SLC9A1,TRIO	15
Cell Morphology, Organ Morphology, Skeletal and Muscular System Development and Function, Tissue Morphology	abnormal morphology of skeletal muscle cells	muscles	0.000747	ALS2,CHRNG,DYSF,GAA,KEL,LAMA2,MSTN,MYH4,PPARGC1A,RYR1,TRIO	11
Cellular Function and Maintenance, Organ Development, Tissue Development	function of retinal cells	retina	0.00079	ABCA4,ADGRV1,CDHR1,ERCC6,MAK,PCDH15,PDE6A,RP1,RP1L1,SEMA4A,TUB,USH1C,USH2A	13
Developmental Disorder, Endocrine System Disorders, Hereditary Disorder, Organismal Injury and Abnormalities, Reproductive System Disease	ovarian dysgenesis	reproductive~system	0.00083	FANCC,FSHR,HSD17B4,LARS2,PSMC3IP,SH2B1	6
Gastrointestinal Disease	malabsorption	Gastrointestinal~system	0.00084	MUT,MYO5B,SLC26A3,TMPRSS15	4
Cell Morphology, Embryonic Development, Organ Development, Organ Morphology, Organismal Development, Tissue Development, Tissue Morphology, Visual System Development and Function	morphology of retinal cells	retina	0.000863	ABCA4,ATP8A2,CPLX3,CRB1,EGFLAM,FAT3,LAMB2,MITF,NEUROD4,PLXNA2,PLXNA4,RB1,RDH13,RP1,RP1L1,RPGRIP1,SEMA4A,SEMA5A,TP53BP2,USH2A	20
Auditory and Vestibular System Development and Function, Cell Morphology, Cellular Assembly and Organization	orientation of stereocilia bundles	ears	0.000892	ADGRV1,DCHS1,FAT4,PTPRQ,SMURF1,USH1C,WIF1	7
Cardiovascular Disease, Organismal Injury and Abnormalities, Renal and Urological Disease	reperfusion injury of kidney	kidney	0.000935	C5,C5AR1,CD44,CD55,MBL2,MEP1B,NOS2,TLR2,UNC5B	9
Hereditary Disorder, Neurological Disease, Organismal Injury and Abnormalities	autosomal recessive ataxia	Neurological~Disease	0.000935	ADCK3,ATP8A2,IFT140,KIF1C,PNPLA6,RUBCN,SETX,SLC9A1,SPTBN2	9
Dermatological Diseases and Conditions, Hereditary Disorder, Organismal Injury and Abnormalities	Netherton syndrome	skin	0.000997	DSC3,DSG1,DSP,SMPD1,SPINK5	5
Hereditary Disorder, Neurological Disease, Organismal Injury and Abnormalities	autosomal recessive cerebellar ataxia	Neurological~Disease	0.00112	ADCK3,ATP8A2,IFT140,PNPLA6,RUBCN,SETX,SLC9A1,SPTBN2	8
Cell Morphology, Cellular Assembly and Organization, Nervous System Development and Function	elongation of neurites	neurons	0.00118	AATK,AGER,AGT,ALCAM,ARHGAP32,DIAPH1,ITGA7,MAP1B,MAP2,MAPT,OMG,PHACTR3,SLC9A1,TRIO	14
Hereditary Disorder, Neurological Disease, Organismal Injury and Abnormalities	familial amyotrophic lateral sclerosis	Neurological~Disease	0.00127	ALS2,BCL2L1,ERBB4,NOS1,SETX,SLC1A2,SQSTM1	7
Cell Death and Survival, Cellular Compromise, Organismal Injury and Abnormalities, Skeletal and Muscular Disorders	atrophy of myofiber	muscles	0.00128	ALS2,EPG5,ITGA7,MYH4,PPARGC1A,SCYL1	6
Hereditary Disorder, Ophthalmic Disease, Organismal Injury and Abnormalities	Hereditary Eye Disease	eyes	0.00131	ABCA4,ADAMTS17,ADGRV1,AGK,CDHR1,CERKL,CNGA1,CNGB1,CRB1,FAM161A,FYCO1,HMGB3,HPS1,HPS5,IFT140,IMPG2,KMT2E,LAMA1,LRIT3,MAK,MITF,NR3C1,OCA2,PCDH15,PCYT1A,PDE6A,RARB,RP1,RP1L1,RPGRIP1,SCN10A,SEMA4A,SLC24A1,SLC24A5,TTC8,USH1C,USH2A	37
Cardiovascular System Development and Function, Organ Morphology	size of heart ventricle	heart	0.00141	AGT,AKAP5,APOB,CTNNA3,IGF2R,LDLR,MAP3K1,PDLIM5,PLCB1,TBX2,TRPM2	11
Auditory Disease, Hereditary Disorder, Neurological Disease, Organismal Injury and Abnormalities	hereditary hearing loss	ears	0.00153	ADGRV1,BCS1L,COCH,DCDC2,DFNB59,DIAPH1,DIAPH3,HSD17B4,LARS2,LOXHD1,MARVELD2,MITF,MYH9,MYO15A,OTOG,OTOGL,PCDH15,PTPRQ,SLC26A4,STRC,TMPRSS3,TNC,USH1C,USH2A	24
Behavior	contextual conditioning	behavior	0.00161	ABI2,AMPH,CARF,CCDC88A,CPEB3,EHMT1,ERBB4,FEZ1,GRIK2,GRM7,HDAC2,ITM2B,KIF17,KMT2A,LRRN4,MAP2,PLAT,RYR3	18
Digestive System Development and Function, Organ Development	function of salivary gland	Digestive~system	0.00182	ITPR2,ITPR3,SLC5A8,SLC9A1	4
Cell Morphology, Reproductive System Development and Function	elongation of gonadal cell lines	reproductive~system	0.00182	MAP2,MAP4,MAPT,RRBP1	4
Neurological Disease	peripheral neuropathy	Neurological~Disease	0.00192	AARS,ALS2,AP4B1,AP4E1,AP4M1,ARHGEF10,C5,CACNA2D3,COX10,CYP7B1,DHTKD1,DYNC1H1,DYSF,EPHA5,GDAP1,IKBKAP,KIF1C,NOS1,NR3C1,PLEKHG5,PNPLA6,SCN10A,SCN11A,SCP2,SLC12A6,SPTLC1,WNK1,ZFYVE26	28
Embryonic Development, Organ Development, Organ Morphology, Organismal Development, Tissue Development, Visual System Development and Function	morphology of retina	retina	0.002	ABCA4,APOB,ATP8A2,CDHR1,CP,CPLX3,CRB1,EGFLAM,ERCC6,FAT3,ITGA3,ITGA6,LAMB2,LAMC1,LDLR,MAP1B,MITF,NEUROD4,PKNOX1,PLXNA2,PLXNA4,RARB,RB1,RDH13,RP1,RP1L1,RPGRIP1,SEMA4A,SEMA5A,TP53BP2,TUB,USH2A	32
Cardiovascular Disease, Organismal Injury and Abnormalities	coronary artery disease	cardiovascular~system	0.00223	ADAMTS7,AGT,APOB,C8orf34,CACNA1C,CACNA1E,CACNB2,CD14,CD55,CNTNAP5,CORO2A,CPEB3,CSMD2,CTNNA3,DOCK4,DOCK9,FUT9,GAA,ITGA8,ITGAL,ITGB2,LDLR,LIPC,LRP11,LRP6,LRRC17,MARC1,MIA3,MICAL2,MTHFD1L,MYO3B,NPC1L1,NPR1,NR3C1,PBX3,PLXNA2,PON1,RBFOX1,SELE,SGCG,SLC25A21,SLC9A1,SNAPC4,TLR2,VEPH1,XDH	46
Inflammatory Disease, Inflammatory Response, Skeletal and Muscular Disorders	inflammation of muscle	immune~system	0.0023	ADAM12,AGT,CAPN3,CD55,IFNGR2,LAMA2,MYBPC2,SGCB,TLR2,UTRN	10
Ophthalmic Disease, Organismal Injury and Abnormalities	retinal degeneration	retina	0.00249	ABCA4,ADGRV1,ATP8A2,CASP9,CDHR1,CERKL,CNGA1,CNGB1,CP,CRB1,EFEMP2,ERCC6,FAM161A,FBLN5,HMCN1,IFT140,IMPG2,LDLR,LIPC,LRIT3,MAK,NOS1,NR3C1,PARK2,PCDH15,PCYT1A,PDE6A,PNPLA6,RDH13,RP1,RP1L1,RPGRIP1,SCN10A,SEMA4A,SLC1A1,SLC24A1,TF,TLR2,TTC8,TUB,USH1C,USH2A,VCAN	43
Ophthalmic Disease, Organismal Injury and Abnormalities	degeneration of eye	eyes	0.0025	ABCA4,ADGRV1,APBB2,ATP8A2,CASP9,CDHR1,CERKL,CNGA1,CNGB1,CP,CRB1,EFEMP2,ERCC6,FAM161A,FBLN5,HMCN1,IFT140,IMPG2,LDLR,LIPC,LRIT3,MAK,NOS1,NR3C1,PARK2,PCDH15,PCYT1A,PDE6A,PNPLA6,RDH13,RP1,RP1L1,RPGRIP1,SCN10A,SEMA4A,SLC1A1,SLC24A1,TF,TLR2,TTC8,TUB,USH1C,USH2A,VCAN	44
Developmental Disorder, Hereditary Disorder, Metabolic Disease, Organismal Injury and Abnormalities	Niemann-Pick disease	Metabolic~disease	0.00269	CD14,CD55,NPC1,SMPD1,UGCG	5
Cell Cycle, Embryonic Development	arrest in G2 phase of embryonic stem cells	Embryonic~development	0.0027	CHEK1,MSH2,SMARCA4	3
Antimicrobial Response	aggregation of Influenza A virus	immune~system	0.0027	DMBT1,SFTPA1,SFTPD	3
Organ Morphology, Organismal Development, Renal and Urological System Development and Function	lack of urinary bladder	kidney	0.0027	ITGA3,ITGA6,SESTD1	3
Developmental Disorder, Organismal Injury and Abnormalities, Renal and Urological Disease	agenesis of kidney	kidney	0.0027	FREM1,GRIP1,ITGA8,LAMC1,RET,SLIT3	6
Cell Death and Survival, Cellular Compromise, Neurological Disease, Organismal Injury and Abnormalities, Tissue Morphology	neurodegeneration of hippocampal neurons	neurons	0.0027	EPM2A,FSHR,MAPT,PARK2,PLAT,STAMBP	6
Nervous System Development and Function, Organ Morphology, Organismal Development	abnormal morphology of cerebrum	brain	0.00271	ABI2,ADH7,AGA,APBB2,ASPM,CASP9,CDON,CELSR3,CPEB3,DIAPH1,EHMT1,FSHR,HDAC2,ITGA6,LAMC1,LDLR,LIG4,MANBA,MAP1B,MAP2,PARK2,PEX11B,PLXNA4,PPARGC1A,RB1,SEMA3A,SLC1A2,SMPD1,STAMBP,SYNGAP1,TP53BP2,TRIO	32
Dermatological Diseases and Conditions	blister	skin	0.0028	C5AR1,COL7A1,DSC3,DSG1,FREM1,GRIP1,ITGA6,LAMA3,PLAT,SERPINA1	10
Embryonic Development, Nervous System Development and Function, Organ Development, Organismal Development, Tissue Development	formation of brain	brain	0.0031	AATK,ANK3,APBB2,ASPM,BBS7,BCL2L1,BRCA2,BTBD3,C2CD3,C5orf42,CASP9,CDK5RAP3,CDON,CHD8,CHRD,CRTAC1,CSNK2A1,DLG5,DNAH5,DRAXIN,EPHA5,EPHA7,ERBB4,ERCC6,FAT4,FBXW7,FGF17,FZD6,GALNS,HDAC2,IKBKAP,ITGA3,ITGA6,LAMC1,LRP6,MAP1B,MAPT,MDM4,MED1,MYO16,NEUROD4,NF1,NOS2,NR3C1,NUMB,OR51E2,PAK1,PLCB1,PLXNA4,POMK,POU1F1,RAD9B,RARB,RBFOX2,ROBO3,SEMA3A,SEMA5A,SETD2,SH2B1,SIM1,SLC1A2,SLC6A17,SLIT1,SLIT3,SMARCA4,STK36,S…	79
Cellular Compromise, Organismal Injury and Abnormalities, Skeletal and Muscular Disorders	atrophy of muscle cells	muscles	0.00315	ALS2,EPG5,ITGA7,MSTN,MYH4,PPARGC1A,SCYL1	7
Embryonic Development, Organ Development, Organismal Development, Tissue Development, Visual System Development and Function	development of retina	retina	0.00334	ALMS1,CCDC66,CRB1,FBXW7,HCN1,LAMB2,MAP1B,MED1,MITF,NEUROD4,NOS2,OLFM3,RARB,RDH13,RP1,RP1L1,RPGRIP1,SEMA5A,TBC1D32	19
Nervous System Development and Function, Organ Morphology, Organismal Development	size of anterior commissure	brain	0.00338	MAP1B,MAP2,PLXNA4,SEMA3B	4
Cardiovascular System Development and Function, Cell Cycle	cell cycle progression of endothelial cells	cardiovascular~system	0.00338	CD44,DMP1,RB1,REM2	4
Cell Morphology, Cellular Assembly and Organization, Cellular Development, Cellular Function and Maintenance, Cellular Growth and Proliferation, Nervous System Development and Function, Tissue Development	polarization of hippocampal neurons	neurons	0.00338	APC,MAP1B,MAP2,MAPT	4
Hereditary Disorder, Organismal Injury and Abnormalities, Renal and Urological Disease	familial nephrotic syndrome	kidney	0.00375	ITGA2,ITGA3,ITGA6,LAMB2,NPHS2,PLCE1	6
Hereditary Disorder, Neurological Disease, Organismal Injury and Abnormalities	autosomal recessive spinocerebellar ataxia	Neurological~Disease	0.00375	ADCK3,PNPLA6,RUBCN,SETX,SLC9A1,SPTBN2	6
Nervous System Development and Function, Organ Morphology, Organismal Development	abnormal morphology of cerebral cortex	brain	0.00381	ABI2,ADH7,APBB2,ASPM,CASP9,CDON,CELSR3,CPEB3,DIAPH1,EHMT1,FSHR,HDAC2,ITGA6,LAMC1,LDLR,LIG4,MANBA,MAP1B,MAP2,PARK2,PEX11B,PLXNA4,PPARGC1A,RB1,SEMA3A,SLC1A2,SMPD1,STAMBP,SYNGAP1,TP53BP2,TRIO	31
Organ Development	function of eye	eyes	0.00399	ABCA4,ADGRV1,CDHR1,EGFLAM,ERCC6,GLRA3,LAMB2,MAK,PCDH15,PDE6A,RP1,RP1L1,SEMA4A,SEMA5A,TUB,USH1C,USH2A	17
Cell Morphology, Cellular Assembly and Organization, Cellular Development, Cellular Function and Maintenance, Cellular Growth and Proliferation, Nervous System Development and Function, Tissue Development	morphogenesis of neurites	neurons	0.00414	AGER,AKAP5,ALS2,APC,ARHGAP32,ARHGAP33,ATP8A2,BTBD3,CAPRIN2,CCDC88A,CD44,CELSR2,CIT,CLMN,CPEB3,CPT1C,CUL7,DCDC2,DIAPH1,DLG5,EHMT1,ERBB4,FARP1,FNBP1,FSHR,GALNS,HERC1,IQUB,ITGA3,ITSN1,LAMA1,LAMB1,LAMB2,LAMC1,LRRC4,MAP1B,MAPT,MYO16,MYO5B,MYOC,NEK3,NEU3,NF1,NFATC4,NOS1,NRP1,NUMB,OPA1,PAK1,PLAT,PLXNA4,PPP1R9A,PREX2,RB1,RBFOX2,REM2,RTN4,RYR1,SEMA3A,SEMA4D,SIPA1L1,SLIT1,SPTBN2,SYNGAP1,TNC,TNIK,UGCG,UHMK1	68
Visual System Development and Function	electrophysiology of retinal cone cells	retina	0.00458	ABCA4,ADGRV1,ATP8A2,CPLX3,EGFLAM,RP1,RP1L1,RPGRIP1,UNC13B	9
Cell-To-Cell Signaling and Interaction, Nervous System Development and Function	adhesion of neuronal cells	neurons	0.00464	ALS2,CACNB2,CP,ITGA3,LAMB2,LAMC1,NRXN3,PAK1,RET,SNTA1,TNC,UNC13B,UTRN	13
Embryonic Development, Organ Development, Organ Morphology, Organismal Development, Tissue Development, Visual System Development and Function	abnormal morphology of retina	retina	0.00519	ABCA4,APOB,ATP8A2,CDHR1,CP,CPLX3,CRB1,EGFLAM,ERCC6,FAT3,ITGA3,ITGA6,LAMB2,LAMC1,LDLR,MAP1B,NEUROD4,PLXNA2,PLXNA4,RARB,RB1,RDH13,RP1,RP1L1,RPGRIP1,SEMA5A,TP53BP2,TUB,USH2A	29
Cardiovascular Disease, Developmental Disorder, Hematological Disease, Organismal Injury and Abnormalities	congenital aplastic anemia	hematologic~system	0.00554	BRCA2,BRIP1,FANCA,FANCC,FANCE,NR3C1,PALB2,RAD51C,SLX4	9
Cardiovascular Disease, Hematological Disease, Organismal Injury and Abnormalities, Renal and Urological Disease	thrombosis of renal glomerulus	kidney	0.00565	C2,NOS1,NOS2,TLR2	4
Embryonic Development, Nervous System Development and Function, Organ Development, Organismal Development, Tissue Development, Visual System Development and Function	development of retinal pigment epithelium	retina	0.00565	MED1,MITF,RARB,TBC1D32	4
Dermatological Diseases and Conditions, Inflammatory Disease, Inflammatory Response	severe dermatitis	skin	0.00565	BCL2L1,CD44,NR3C1,TLR2	4
Cell-To-Cell Signaling and Interaction, Nervous System Development and Function	miniature end-plate potential	neurons	0.00584	CHRNG,LAMB2,RIMS2,SNTA1,UTRN	5
Cell Morphology, Cellular Assembly and Organization, Nervous System Development and Function	elongation of axons	neurons	0.00619	AATK,AGT,DIAPH1,ITGA7,MAP1B,MAPT,OMG,PHACTR3	8
Cardiovascular System Development and Function, Cell Cycle	arrest in cell cycle progression of endothelial cells	cardiovascular~system	0.0063	CD44,DMP1,REM2	3
Developmental Disorder	hypodysplasia	Developmental~disorder	0.0063	ARID4A,ITGA8,RET	3
Cell Morphology, Embryonic Development	modification of embryonic stem cells	Embryonic~development	0.0063	BRCA2,DMBT1,POLK	3
Cell Death and Survival, Hematological Disease, Immunological Disease	cytolysis of phagocytes	immune~system	0.0063	CD226,ITGB2,NCR3	3
Infectious Diseases	replication of respiratory syncytial virus	immune~system	0.0063	MYO5B,RAB11FIP1,SFTPD	3
Cellular Movement, Nervous System Development and Function	migration of sympathetic neuron	neurons	0.0063	NRP1,RET,SEMA3A	3
Cardiovascular System Development and Function, Ophthalmic Disease, Organismal Development, Organismal Injury and Abnormalities, Visual System Development and Function	neovascularization of subretinal space	retina	0.0063	ADAM15,NOS1,NOS2	3
Tissue Morphology	abnormal morphology of maxillary shelf	skeletal	0.0063	CDON,FOXF2,NDST3	3
Cell Cycle, Hair and Skin Development and Function	G2/M phase of epithelial cell lines	skin	0.0063	PLK3,RBBP6,TET1	3
Connective Tissue Disorders, Dermatological Diseases and Conditions, Developmental Disorder, Hereditary Disorder, Organismal Injury and Abnormalities	non-Herlitz type generalized junctional epidermolysis bullosa	skin	0.0063	COL17A1,LAMA3,LAMB3	3
Cell-To-Cell Signaling and Interaction, Cellular Assembly and Organization, Cellular Development, Cellular Function and Maintenance, Cellular Growth and Proliferation, Nervous System Development and Function, Skeletal and Muscular System Development and Function, Tissue Development	formation of neuromuscular junctions	neurons	0.00664	ALS2,CACNB2,LAMB2,LAMC1,PAK1,SNTA1,TNC,UNC13B,UTRN	9
Cell-To-Cell Signaling and Interaction, Embryonic Development, Organ Development, Organismal Development, Skeletal and Muscular System Development and Function, Tissue Development	fusion of myoblasts	muscles	0.00665	ADAM12,CDON,DYSF,LAMA1,LAMA2,MSTN,MYH9,MYOF,NEU3,NOS1,PLCB1	11
Embryonic Development, Tissue Development	proliferation of embryoblast	Embryonic~development	0.0067	BRCA2,CENPE,CHEK1,DMBT1,PALB2,ZPR1	6
Cell Death and Survival	apoptosis of photoreceptors	retina	0.0067	BCL2L1,CASP9,NOS2,S1PR3,SEMA4A,TUB	6
Cell Death and Survival, Embryonic Development	cell death of embryonic stem cells	Embryonic~development	0.00675	AGO3,BRCA2,CDC7,CHEK1,MAP3K1,MSH2,NOS2,NRP1,POLK,RAD50	10
Neurological Disease	cerebellar ataxia	Neurological~Disease	0.00687	ADCK3,ATP8A2,CCDC88C,CNGA1,ENO2,IFNGR2,IFT140,KIF1C,PDE6A,PNPLA6,RP1,RUBCN,SCN10A,SCN11A,SCN7A,SETX,SLC1A1,SLC1A2,SLC24A1,SLC9A1,SPTBN2,TGM6	22
Developmental Disorder, Neurological Disease, Organismal Injury and Abnormalities	congenital malformation of brain	brain	0.00699	APOB,ASPM,BCL2L1,BRCA2,CASP9,CCDC88C,CDON,CECR2,CHMP1A,CHRD,CLASP1,DRAXIN,EPG5,EPHA7,ERCC6,ERMARD,GRHL3,HECTD1,IFT57,KIF5C,LAMA1,LAMB1,LAMC1,LIG4,LIN9,LRP6,MAP1B,MDM4,MPDZ,MTHFD1L,NDST3,NF1,NIN,ORC4,PALB2,PCLO,PCNT,POMGNT1,POMK,RARS2,SETD2,SLC12A6,SMARCA4,SMURF1,STAMBP,TBC1D7,XRCC2	47
Embryonic Development, Organ Development, Organ Morphology, Organismal Development, Tissue Development, Visual System Development and Function	morphology of eye	eyes	0.00727	ABCA4,ABCC6,ABI2,APOB,ATF4,ATP8A2,BCAR3,CDHR1,CP,CPLX3,CRB1,EGFLAM,ERCC6,FAT3,GALNS,HPS5,ITGA3,ITGA6,KRT12,LAMB2,LAMC1,LDLR,MAP1B,MAPT,MITF,NDST3,NEUROD4,NID1,NOS2,PKNOX1,PLXNA2,PLXNA4,RARB,RB1,RDH13,RP1,RP1L1,RPGRIP1,SEMA4A,SEMA5A,SLC4A3,TP53BP2,TUB,USH2A	44
Nervous System Development and Function	development of central nervous system	nervous~system	0.0075	AATK,AGER,ANK3,APBB2,ASPM,BBS7,BCL2L1,BRCA2,BTBD3,C2CD3,C5orf42,CASP9,CDK5RAP3,CDON,CHD8,CHRD,CIT,CRTAC1,CSNK2A1,DLG5,DNAH5,DRAXIN,EPHA5,EPHA7,ERBB4,ERCC6,FAT4,FBXW7,FGF17,FZD6,GALNS,GRHL3,HDAC2,IFT57,IKBKAP,ITGA3,ITGA6,LAMA2,LAMB2,LAMC1,LIG4,LRP6,MAP1B,MAP2,MAPT,MDM4,MED1,MGAT5B,MYO16,NEUROD4,NF1,NOS2,NR3C1,NUMB,OR51E2,PAK1,PARK2,PBX3,PLCB1,PLXNA4,POMK,POU1F1,PRMT5,RAD9B,RARB,RBFOX2,ROBO3,RTN4,S…	97
Cardiovascular System Development and Function, Cellular Function and Maintenance, Tissue Development	function of vascular endothelial cells	cardiovascular~system	0.00754	ARHGEF4,CD44,CTSS,EFEMP2,NOS1,NOS2,NOSTRIN,RAC2	8
Cell Morphology, Cellular Assembly and Organization, Cellular Development, Cellular Function and Maintenance, Cellular Growth and Proliferation	formation of plasma membrane projections	blood	0.0076	ABI2,ACTB,AGER,AKAP5,ALS2,ANK3,APC,ARHGAP32,ARHGAP33,ATP8A2,AVIL,BTBD3,CAMK1D,CAPRIN2,CCDC88A,CD44,CELSR2,CIT,CLMN,CPEB3,CPT1C,CUL7,DCDC2,DIAPH1,DLG5,EHMT1,EPHA7,ERBB4,FARP1,FNBP1,FSHR,GALNS,HERC1,IQUB,ITGA3,ITSN1,KIF13B,KIF5B,LAMA1,LAMB1,LAMB2,LAMC1,LRRC4,MAP1B,MAP2,MAPT,MYO16,MYO5B,MYOC,NEK3,NEU3,NF1,NFATC4,NOS1,NRP1,NUMB,OPA1,PAK1,PARD6B,PLAT,PLXNA4,PPP1R9A,PREX2,PRKCSH,PTPRE,RB1,RBFOX2,REM2,R…	92
Nervous System Development and Function, Organ Morphology, Organismal Development	morphology of cerebral cortex	brain	0.00763	ABI2,ADH7,APBB2,ASPM,CASP9,CDON,CELSR3,CPEB3,DIAPH1,EHMT1,FSHR,HDAC2,ITGA3,ITGA6,LAMC1,LDLR,LIG4,MANBA,MAP1B,MAP2,PARK2,PEX11B,PLXNA4,PPARGC1A,RB1,SEMA3A,SLC1A2,SMPD1,STAMBP,SYNGAP1,TP53BP2,TRIO	32
Cell Morphology, Cellular Assembly and Organization, Cellular Development, Cellular Function and Maintenance, Cellular Growth and Proliferation, Nervous System Development and Function, Tissue Development	neuritogenesis	neurons	0.00779	ABI2,ACTB,AGER,AKAP5,ALS2,ANK3,APC,ARHGAP32,ARHGAP33,ATP8A2,AVIL,BTBD3,CAMK1D,CAPRIN2,CCDC88A,CD44,CELSR2,CIT,CLMN,CPEB3,CPT1C,CUL7,DCDC2,DIAPH1,DLG5,EHMT1,EPHA7,ERBB4,FARP1,FNBP1,FSHR,GALNS,HERC1,IQUB,ITGA3,ITSN1,KIF13B,LAMA1,LAMB1,LAMB2,LAMC1,LRRC4,MAP1B,MAP2,MAPT,MYO16,MYO5B,MYOC,NEK3,NEU3,NF1,NFATC4,NOS1,NRP1,NUMB,OPA1,PAK1,PARD6B,PLAT,PLXNA4,PPP1R9A,PREX2,PRKCSH,PTPRE,RB1,RBFOX2,REM2,RET,ROB…	90
Hematological Disease, Hereditary Disorder, Organismal Injury and Abnormalities	constitutional bone marrow failure syndrome	hematologic~system	0.0079	BRCA2,BRIP1,FANCA,FANCC,FANCE,NR3C1,PALB2,RAD51C,SLX4	9
Behavior	perseverance behavior	behavior	0.00807	NR3C2,RTN4	2
Developmental Disorder, Hereditary Disorder, Neurological Disease, Organismal Injury and Abnormalities	autosomal recessive nonsyndromic hydrocephalus	brain	0.00807	CCDC88C,MPDZ	2
Cardiovascular System Development and Function	preservation of elastic lamina	cardiovascular~system	0.00807	CTSS,LDLR	2
Cardiovascular Disease, Hereditary Disorder, Organismal Injury and Abnormalities	idiopathic infantile arterial calcification	cardiovascular~system	0.00807	ABCC6,ENPP1	2
Cardiovascular System Development and Function, Cell Cycle	arrest in cell cycle progression of vascular endothelial cells	cardiovascular~system	0.00807	CD44,DMP1	2
Connective Tissue Disorders, Developmental Disorder, Hereditary Disorder, Organismal Injury and Abnormalities, Skeletal and Muscular Disorders	Van Maldergem Wetzburger Verloes syndrome	Developmental~disorder	0.00807	DCHS1,FAT4	2
Developmental Disorder, Hereditary Disorder, Organismal Injury and Abnormalities	Prader-Willi-like syndrome	Developmental~disorder	0.00807	MAGEL2,SIM1	2
Auditory and Vestibular System Development and Function, Cell Morphology, Nervous System Development and Function, Organ Morphology, Organismal Development, Tissue Morphology	fusion of stereocilia in inner hair cells	ears	0.00807	PTPRQ,SLC26A4	2
Auditory and Vestibular System Development and Function, Cell Morphology, Organ Morphology, Organismal Development	abnormal morphology of cochlear hair cell inter-stereocilial links	ears	0.00807	ADGRV1,USH1C	2
Cell Morphology, Cellular Assembly and Organization	elongation of stereocilia	ears	0.00807	MYO15A,PTPRQ	2
Embryonic Development, Organismal Development	initiation of gastrulation	Embryonic~development	0.00807	LAMA1,LAMA5	2
Cardiovascular System Development and Function, Organ Morphology, Organismal Development	area of aortic valve	heart	0.00807	APOB,LDLR	2
Cardiovascular System Development and Function, Organ Morphology, Organismal Development, Skeletal and Muscular System Development and Function	morphology of ventricular compact zone	heart	0.00807	BCL2L1,CASP9	2
Cardiovascular Disease, Hereditary Disorder, Organismal Injury and Abnormalities	short-QT syndrome 4	heart	0.00807	CACNA1C,CACNB2	2
Cell-To-Cell Signaling and Interaction, Cell-mediated Immune Response, Cellular Movement, Hematological Disease, Hematological System Development and Function, Immune Cell Trafficking, Immunological Disease	deadhesion of T lymphocytes	immune~system	0.00807	ITGAL,SPN	2
Cell-To-Cell Signaling and Interaction	recognition of dendritic cells	immune~system	0.00807	CD226,NCR3	2
Cardiovascular Disease, Organ Morphology, Organismal Injury and Abnormalities, Renal and Urological Disease	distension of glomerular capillary	kidney	0.00807	LAMA1,LAMA5	2
Cellular Movement, Organismal Injury and Abnormalities, Renal and Urological Disease, Tissue Morphology	breakdown of glomerular basement membrane	kidney	0.00807	LAMA1,LAMA5	2
Gastrointestinal Disease, Hepatic System Disease, Organismal Injury and Abnormalities	acute-on-chronic liver failure	liver	0.00807	IL23A,IL23R	2
Developmental Disorder, Gastrointestinal Disease, Hepatic System Disease, Hereditary Disorder, Metabolic Disease, Organismal Injury and Abnormalities	Dubin-Johnson syndrome	liver	0.00807	ABCC2,ABCC3	2
Molecular Transport, Small Molecule Biochemistry	secretion of bilirubin	liver	0.00807	ABCC2,ABCC3	2
Respiratory System Development and Function	surface tension of pulmonary surfactant	lungs	0.00807	SFTPA1,SFTPD	2
Cell-To-Cell Signaling and Interaction	response of bronchial epithelial cells	lungs	0.00807	EXOC2,TLR2	2
Organismal Development	organization of pulmonary surfactant	lungs	0.00807	SFTPA1,SFTPD	2
Cellular Function and Maintenance, Skeletal and Muscular System Development and Function, Tissue Development	organization of myoepithelial cells	muscles	0.00807	DSC2,DSG2	2
Cell-To-Cell Signaling and Interaction, Nervous System Development and Function	contact repulsion of vascular endothelial cells	nervous~system	0.00807	NRP1,SEMA3B	2
Neurological Disease	severe neuropathy	Neurological~Disease	0.00807	COX10,NOS1	2
Cellular Assembly and Organization, Cellular Function and Maintenance, Nervous System Development and Function	elongation of dendritic spine neck	neurons	0.00807	ITSN1,NUMB	2
Cellular Movement, Nervous System Development and Function	distribution of sympathetic neuron	neurons	0.00807	NRP1,SEMA3A	2
Connective Tissue Disorders, Dermatological Diseases and Conditions, Developmental Disorder, Hereditary Disorder, Metabolic Disease, Organismal Injury and Abnormalities	autosomal recessive cutis laxa type IA	skin	0.00807	EFEMP2,FBLN5	2
Developmental Disorder	agenesis	Developmental~disorder	0.00811	ARID4A,ARID5B,BACH2,BCL6,BLNK,BRCA2,DCLRE1C,DRAXIN,EPG5,FREM1,GRIP1,IL31RA,ITGA8,KMT2E,LAMC1,MAP1B,MDM4,NFAT5,RAG2,RET,SLC12A6,SLIT3	22
Cell Death and Survival, Skeletal and Muscular Disorders	necrosis of skeletal muscle	muscles	0.00811	AGT,CASP9,PARK2,RB1,SGCG	5
Hematological Disease, Immunological Disease	lymphoproliferative disorder	immune~system	0.00857	ABCA10,ABCA7,ABCC3,ACAD11,ACTRT2,ADAM7,ADAMTS16,AGER,ALAS1,AMPH,ANK2,AP4B1,ARID5B,ASB15,BCL2L1,BCL6,BLNK,BRCA2,CAPRIN2,CCT3,CD101,CD14,CD44,CD58,CELSR2,CHD2,CNTNAP5,COL17A1,COL7A1,CORO2A,CTBP2,CYP2C18,DCLRE1C,DDX58,DMXL1,DNAH3,DNAH5,DNAH7,DNAH9,DPYD,DSG2,DSP,DYNC1I1,EGFLAM,ENPP1,ERC1,FAM3B,FAT3,FAT4,FBXW7,FHIT,FLG2,HMCN1,IL23R,IQUB,ITGB2,JAK2,KCNRG,KIAA0100,KMT2A,KRTAP11-1,LAMA3,LIG4,LRP6,MDM4,ME…	128
Auditory Disease, Developmental Disorder, Hereditary Disorder, Neurological Disease, Organismal Injury and Abnormalities	autosomal recessive nonsyndromic hearing impairment	ears	0.00868	OTOG,OTOGL,PCDH15,PTPRQ,SLC26A4,USH1C	6
Cell Death and Survival, Skeletal and Muscular Disorders	necrosis of skeletal muscle cells	muscles	0.00876	AGT,CASP9,PARK2,RB1	4
Hereditary Disorder, Neurological Disease, Organismal Injury and Abnormalities	familial motor neuron disease	neurons	0.00882	ALS2,BCL2L1,DYNC1H1,DYSF,ERBB4,GIGYF2,MAPT,NOS1,PARK2,PLEKHG5,SETX,SLC1A2,SQSTM1	13
Hematological Disease, Organismal Injury and Abnormalities	failure of bone marrow	hematologic~system	0.00884	APC,ARID4A,BRCA2,BRIP1,FANCA,FANCC,FANCE,NR3C1,PALB2,RAD51C,SLX4	11
Embryonic Development, Organismal Development	development of head	skeletal	0.0089	AATK,ABCA4,ABCC6,ABI2,ADGRV1,ALMS1,ALOX15,ANK3,APBB2,APOB,ARID5B,ASPM,ATF4,ATP8A2,BBS7,BCAR3,BCL2L1,BRCA2,BTBD3,C2CD3,C5orf42,CASP9,CCDC66,CDHR1,CDK5RAP3,CDON,CECR2,CHD8,CHRD,CP,CPLX3,CRB1,CRTAC1,CSNK2A1,DLG5,DMP1,DNAH5,DRAXIN,EGFLAM,EPHA5,EPHA7,ERBB4,ERCC6,FAT3,FAT4,FBXW7,FGF17,FOXF2,FREM2,FYCO1,FZD6,GALNS,GRHL3,HCN1,HDAC2,HLA-DMA,HPS5,IKBKAP,ITGA3,ITGA6,ITGA8,KRT12,LAMA3,LAMA5,LAMB1,LAMB2,LAMC1…	145
Cellular Function and Maintenance, Hematological System Development and Function	function of granulocytes	hematologic~system	0.00907	CD14,CLEC7A,DDX58,IL1RL1,IL23A,ITGAL,ITGB2,KMT2E,LCP1,NOS1,PLCB2,PRAM1,RAC2,SELE,SFTPD,SMPD1,SPRED1,UNC5B	18
Organ Development, Skeletal and Muscular System Development and Function	function of skeletal muscle	muscles	0.0102	AGT,CBLB,CHRNG,DYSF,GAA,IFRD1,ITGA7,KEL,LAMA2,MAMSTR,MSTN,MYH4,NOS1,POMGNT1,PPARGC1A,PRKAB2,RYR1,SCYL1,SGCB,SGCG	20
Cell Morphology	abnormal morphology of plasma membrane	blood	0.0103	AATK,AGA,ALS2,CAPN3,CHRNG,DYSF,EHMT1,EPHA7,ERCC6,KEL,LAMB2,LDLR,MAP1B,MAPT,NFASC,NOS1,PLXNA2,PLXNA4,RET,SEMA5A,SEZ6,SGCB,SLC12A6,SNTA1,SYNGAP1,UGCG,UNC13B,UTRN,VCAN	29
Cellular Compromise, Organismal Injury and Abnormalities, Skeletal and Muscular Disorders, Tissue Morphology	degeneration of myofiber	muscles	0.0109	DYSF,HDAC2,MYOF,PPARGC1A,SGCB	5
Embryonic Development, Organ Development, Organ Morphology, Organismal Development, Tissue Development, Visual System Development and Function	abnormal morphology of retinal layer	retina	0.0113	ABCA4,APOB,ATP8A2,CP,ERCC6,FAT3,ITGA3,ITGA6,LAMB2,LDLR,MAP1B,NEUROD4,PLXNA2,PLXNA4,SEMA5A,TP53BP2	16
Hematological System Development and Function, Inflammatory Response, Tissue Morphology	quantity of neutrophils	immune~system	0.0114	AGER,AMBP,ARID4A,C5,C5AR1,C6,CLEC7A,CSF3R,DIAPH1,DOK2,FANCC,GCNT4,IL23A,IL25,IL4R,ITGA3,ITGAL,ITGB2,KDM5A,KMT2E,LDLR,MFAP5,NOD2,NOS2,PLA2R1,PLCE1,PREP,RAC2,SELE,SFTPA1,SFTPD,TET1,TF,TLR2,TLR5,VTCN1	36
Cell-To-Cell Signaling and Interaction, Hematological System Development and Function, Hematopoiesis	hemagglutination of red blood cells	blood	0.0118	DMBT1,SFTPA1,SFTPD	3
Cardiovascular Disease, Organismal Injury and Abnormalities, Tissue Morphology	surface area of atherosclerotic lesion	cardiovascular~system	0.0118	APOB,LDLR,NPC1L1	3
Auditory Disease, Neurological Disease	progressive sensorineural hearing loss	ears	0.0118	COCH,MYH9,STRC	3
Cellular Compromise, Neurological Disease, Organismal Injury and Abnormalities	damage of pyramidal neurons	neurons	0.0118	EPG5,PPARGC1A,SLC1A2	3
Cell-To-Cell Signaling and Interaction, Hair and Skin Development and Function	binding of keratinocytes	skin	0.0118	ITGA3,ITGA6,ITGAL	3
Dermatological Diseases and Conditions	psoriatic lesion	skin	0.0118	KRT15,SELE,TNIP1	3
Auditory Disease, Neurological Disease	nonsyndromic hearing impairment	ears	0.0123	COCH,DCDC2,MYH9,OTOG,OTOGL,PCDH15,PTPRQ,SLC26A4,STRC,USH1C	10
Organismal Injury and Abnormalities	disorder of pigmentation	pigmentation	0.0125	ABCC2,ABCC3,ALOX15B,AMBP,ANKRD12,CCDC88A,EPG5,GOLGA4,HPS1,HPS5,MITF,MMP20,NR3C1,OCA2,PDE6A,PMEL,RBBP6,RET,SLC24A5	19
Endocrine System Disorders	primary hyperparathyroidism	endocrine~system	0.0128	CDC73,CYP24A1,NR3C2,RET	4
Infectious Diseases	infectivity of Influenza A virus	immune~system	0.0128	DMBT1,MBL2,SFTPA1,SFTPD	4
Cell Death and Survival, Skeletal and Muscular Disorders	cell death of myofiber	muscles	0.0128	DYSF,PRKAB2,SGCB,SLC8A3	4
Cellular Movement, Nervous System Development and Function	guidance of axons	neurons	0.0128	ABLIM1,ALCAM,ANK3,APBB2,CELSR3,DRAXIN,EPHA5,ERBB4,FEZ1,GALNS,KIF5C,LAMA2,LAMB2,NFASC,NRP1,NRXN3,PLXNA4,ROBO3,SEMA3A,SEMA3B,SEMA5A,SLIT1,SLIT3,TTC8,UNC5B	25
Ophthalmic Disease, Organismal Injury and Abnormalities	chorioretinopathy	retina	0.0128	CRB1,NR3C1,NR3C2,PNPLA6	4
Dermatological Diseases and Conditions, Organismal Injury and Abnormalities	formation of blister	skin	0.0128	FREM1,GRIP1,PLAT,SERPINA1	4
Organismal Injury and Abnormalities, Reproductive System Disease, Skeletal and Muscular Disorders	pelvic organ prolapse	reproductive~system	0.0129	APC,FREM1,NR3C1,PLAT,RAG2,SCN10A,SERPINA1,SLC26A3	8
Organismal Injury and Abnormalities, Skeletal and Muscular Disorders	atrophy of muscle	muscles	0.0135	AARS,AGT,ALS2,ARHGEF10,BUB3,CBLB,DHTKD1,DYNC1H1,DYSF,EPG5,GAA,GDAP1,ITGA7,MAMSTR,MSTN,MYH4,NOS1,NR3C1,PLEKHG5,PPARGC1A,SCYL1,SETX,SGCB,SQSTM1	24
Cell-To-Cell Signaling and Interaction	fusion of muscle cells	muscles	0.0137	ADAM12,CDON,DYSF,IFRD1,LAMA1,LAMA2,MSTN,MYH9,MYOF,NEU3,NOS1,PLCB1	12
Cellular Assembly and Organization	stabilization of plasma membrane	blood	0.0138	ANK3,DSP,IQUB,ITGA3,TJP3,TNC	6
Cardiovascular Disease, Organismal Injury and Abnormalities	coronary disease	cardiovascular~system	0.0142	ADAMTS7,AGT,APOB,C5,C8orf34,CACNA1C,CACNA1E,CACNB2,CD14,CD55,CHRNA6,CHRNG,CNTNAP5,CORO2A,CPEB3,CSMD2,CTNNA3,DOCK4,DOCK9,FUT9,GAA,ITGA8,ITGAL,ITGB2,LDLR,LIPC,LRP11,LRP6,LRRC17,MARC1,MIA3,MICAL2,MTHFD1L,MYO3B,NPC1L1,NPR1,NR3C1,PBX3,PLAT,PLXNA2,PON1,RBFOX1,SELE,SGCG,SLC25A21,SLC9A1,SNAPC4,TLR2,VEPH1,VWF,XDH	51
Developmental Disorder, Hereditary Disorder, Immunological Disease, Organismal Injury and Abnormalities	complement component deficiency	immune~system	0.0144	C1S,C2,C5,C6,C8B	5
Cell-To-Cell Signaling and Interaction	binding of neuroglia	nervous~system	0.0144	CD44,ERBB4,ITGA6,ITGA7,LAMA2	5
Neurological Disease	sporadic amyotrophic lateral sclerosis	Neurological~Disease	0.0144	ACTB,BCL2L1,NOS1,PON1,SLC1A2	5
Cardiovascular System Development and Function, Cellular Function and Maintenance, Tissue Development	function of endothelial cells	cardiovascular~system	0.0148	ARHGEF4,CD44,CTSS,EFEMP2,NOS1,NOS2,NOSTRIN,NR3C2,RAC2	9
Neurological Disease	paralysis	Neurological~Disease	0.0148	ALS2,AP4B1,AP4E1,AP4M1,CHRNG,COX10,CYP7B1,EPG5,GAA,KIF21A,LAMC1,MAP1B,MAPT,NF1,NFASC,NR3C1,PNPLA6,RYR1,SCN10A,SCN11A,SCN7A,SCYL1,SLC1A1,SLC1A2,TGM1,ZFYVE26	26
Ophthalmic Disease, Organismal Injury and Abnormalities	age-related macular degeneration	retina	0.0148	ABCA4,CP,EFEMP2,ERCC6,FBLN5,HMCN1,LIPC,NR3C1,TF	9
Cellular Movement, Hematological Disease, Immunological Disease, Inflammatory Disease, Inflammatory Response, Respiratory Disease	eosinophilia of lung	immune~system	0.0149	ACTB,AGER,ANXA3,C5,CTSS,IL1RL1,IL25,IL4R,MYH9,NR3C1,RAG2	11
Cellular Assembly and Organization, Nervous System Development and Function	fasciculation of axons	neurons	0.015	CELSR3,CRTAC1,FEZ1,NRP1,RTN4,SEMA3A,SEMA5A	7
Embryonic Development, Nervous System Development and Function, Organ Development, Organismal Development, Tissue Development	formation of telencephalon	brain	0.0155	APBB2,BCL2L1,CASP9,CRTAC1,CSNK2A1,DNAH5,IKBKAP,MAP1B,NF1,NUMB,OR51E2,PAK1,PLXNA4,RARB,SEMA3A,SLC1A2,SLIT1,SZT2,TBX20,TDO2,TG,TNC,TRIO,TTC8	24
Metabolic Disease, Organismal Injury and Abnormalities, Renal and Urological Disease	albuminuria	kidney	0.0155	AGER,AGT,CACNA1C,CACNB2,CD55,CUBN,LAMB2,MYH9,NPHS2,NR3C2,SMARCAL1,TLR2,VWF	13
Neurological Disease	sensory neuropathy	Neurological~Disease	0.0164	AARS,ALS2,AP4B1,AP4E1,AP4M1,ARHGEF10,CYP7B1,DHTKD1,DYNC1H1,GDAP1,KIF1C,PLEKHG5,PNPLA6,SCN10A,SLC12A6,ZFYVE26	16
Cardiovascular System Development and Function, Cell Morphology	shape change of vascular endothelial cells	cardiovascular~system	0.0168	CD44,CTBP2,ITGA2,KMT2A,PAK1,PLAT,S1PR3,TNC,TNN,UNC5B,VWF	11
Cell-To-Cell Signaling and Interaction, Hematological System Development and Function	agglutination of blood cells	blood	0.0178	DMBT1,SFTPA1,SFTPD,VWF	4
Cardiovascular Disease, Organismal Injury and Abnormalities, Tissue Morphology	quantity of vascular lesion	cardiovascular~system	0.0178	ALOX15,KRIT1,LDLR,SDC4	4
Developmental Disorder, Hereditary Disorder, Organismal Injury and Abnormalities	primordial dwarfism	Developmental~disorder	0.0178	CLASP1,LARP7,NIN,PCNT	4
Auditory Disease, Hereditary Disorder, Neurological Disease, Ophthalmic Disease, Organismal Injury and Abnormalities	Usher syndrome	ears	0.0178	ADGRV1,PCDH15,USH1C,USH2A	4
Cardiovascular Disease, Organismal Injury and Abnormalities, Skeletal and Muscular Disorders	arrhythmogenic right ventricular dysplasia	heart	0.0178	CTNNA3,DSC2,DSG2,DSP	4
Cell-To-Cell Signaling and Interaction, Inflammatory Response	immune response of epithelial cells	immune~system	0.0178	DDX58,EXOC2,IL25,TLR2	4
Embryonic Development, Tissue Morphology	morphology of mullerian duct	reproductive~system	0.0178	ITGA3,ITGA6,LAMC1,RARB	4
Cell Cycle, Hair and Skin Development and Function	cell cycle progression of epidermal cells	skin	0.0178	ERCC6,PRKD3,RB1,XPC	4
Neurological Disease	spinocerebellar disease	Neurological~Disease	0.0182	ADCK3,ALS2,AP4B1,AP4E1,AP4M1,CCDC88C,CNGA1,CYP7B1,ENO2,IFNGR2,KIF1C,PDE6A,PNPLA6,RP1,RUBCN,SETX,SLC24A1,SLC9A1,SPTBN2,TGM6,ZFYVE26	21
Embryonic Development, Organismal Development	development of body axis	skeletal	0.0184	AATK,ABCA4,ABCC6,ABI2,ADGRV1,ALMS1,ALOX15,ANK3,APBB2,APC,APOB,ARID5B,ASPM,ATF4,ATP8A2,BBS7,BCAR3,BCL2L1,BRCA2,BTBD3,C2CD3,C5orf42,CASP9,CCDC66,CDHR1,CDK5RAP3,CDON,CECR2,CHD8,CHRD,CP,CPLX3,CRB1,CRTAC1,CSNK2A1,DLG5,DMP1,DNAH11,DNAH5,DRAXIN,EGFLAM,EPHA5,EPHA7,ERBB4,ERCC6,FAT3,FAT4,FBXW7,FGF17,FOXF2,FREM2,FYCO1,FZD6,GALNS,GRHL3,GRSF1,HCN1,HDAC2,HLA-DMA,HPS5,IFT57,IKBKAP,ITGA3,ITGA6,ITGA8,KIAA0586,KMT…	152
Cardiovascular System Development and Function, Organ Morphology	area of heart	heart	0.0185	AGT,AKAP5,APOB,GDF15,LDLR	5
Skeletal and Muscular System Development and Function	size of muscle	muscles	0.0185	AGT,AKAP5,CHRNG,DYSF,GDF15,HTR2B,IL4R,ITGA7,KEL,LAMA2,MAP3K1,MSTN,MYH4,MYOF,NOS2,NPR1,PLCB1,POMGNT1,PRKAB2,RYR1,SCYL1,SGCG	22
Hereditary Disorder, Neurological Disease, Organismal Injury and Abnormalities	autosomal dominant motor neuron disease	neurons	0.0185	DYNC1H1,ERBB4,GIGYF2,PARK2,SETX	5
Embryonic Development, Organ Development, Organismal Development, Tissue Development, Visual System Development and Function	development of retinal tissue	retina	0.0191	ALMS1,CCDC66,CRB1,HCN1,LAMB2,MED1,NEUROD4,OLFM3,RDH13,RP1,RP1L1,RPGRIP1	12
Cell Death and Survival, Embryonic Development	apoptosis of ectoderm	Embryonic~development	0.0192	CHD8,DHX9,UGCG	3
Cell Morphology, Organ Morphology, Skeletal and Muscular System Development and Function, Tissue Morphology	size of muscle cells	muscles	0.0192	AGT,AKAP5,CHRNG,DYSF,GDF15,HTR2B,IL4R,ITGA7,KEL,LAMA2,MAP3K1,MSTN,MYH4,NPR1,PLCB1,POMGNT1,PRKAB2,RYR1,SCYL1,SGCG	20
Cell Morphology, Organ Morphology, Skeletal and Muscular System Development and Function, Tissue Morphology	abnormal morphology of sarcolemma	muscles	0.0192	CAPN3,DYSF,SGCB	3
Embryonic Development, Tissue Morphology	abnormal morphology of mullerian duct	reproductive~system	0.0192	ITGA3,ITGA6,LAMC1	3
Cell Death and Survival	cell death of lens cells	retina	0.0192	CASP9,ITGA6,RB1	3
Dermatological Diseases and Conditions	hand dermatosis	skin	0.0192	NR3C1,RARB,RXRG	3

## Sheet: Table  S7 
Table S6 . Significant canonical pathways
Canonical Pathways	-log(p-value)	Ratio	z-score	Molecules
Role of BRCA1 in DNA Damage Response	3.82	0.231	NaN	RBL2,TOPBP1,ACTB,MDC1,RPA1,FANCC,SMARCA4,RAD50,CHEK1,FANCE,RB1,RFC4,MSH2,MSH6,BRCA2,BRIP1,CHEK2,FANCA
Caveolar-mediated Endocytosis Signaling	2.41	0.197	NaN	RAB5C,ITSN1,ACTB,COPA,ITGA2,ITGA8,ITGA6,ITGAL,DYRK3,ITGB2,ITGA3,CD55,ITGA11,ITGA7
Complement System	2.34	0.243	NaN	ITGB2,CD55,MBL2,C5AR1,C1S,C8B,C6,C2,C5
tRNA Charging	2.18	0.231	NaN	TARS2,RARS2,IARS2,VARS2,TARSL2,LARS2,DARS,AARS,IARS
Agrin Interactions at Neuromuscular Junction	2.11	0.188	NaN	RAC2,ACTB,ITGA2,LAMA2,ITGA6,ITGAL,LAMC1,ITGB2,ITGA3,PAK1,ERBB4,UTRN,LAMB1
UDP-D-xylose and UDP-D-glucuronate Biosynthesis	2.09	1	NaN	UXS1,UGDH
nNOS Signaling in Skeletal Muscle Cells	2.09	0.333	NaN	NOS1,RYR3,SNTA1,RYR1,CAPN3
